# Supplementary material for: Transcriptome and Metabolome Analysis Revealed That Exogenous Spermidine-Modulated Flavone Enhances the Heat Tolerance of Lettuce
Source: MDPI journal article supplement (doi:10.3390/antiox11122332), 2022-11-25
Supplement: s1 [file s1]

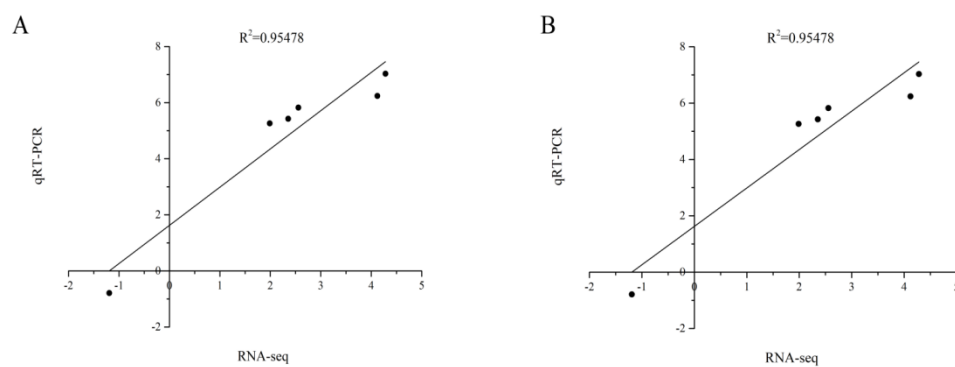

**Supplementary Figure S1. Validation of the RNA-Seq results by qRT-PCR. Data are presented as the means of three replicates. (A) HSvsH (B) HvsCK**
